# Supplementary material
Source: publisher figshare collection journal article supplement (https://karger.figshare.com/articles/dataset/_/24131049)
Supplement: Supplementary file 1 [file 1]

**a**

|                       |      |
|-----------------------|------|
| ♀ : Total number      | 107  |
| Total delivery number | 315  |
| Mean delivery number  | 2.9  |
| Total litter size     | 2077 |
| Mean litter size      | 6.6  |

**b**

|                                                |            |
|------------------------------------------------|------------|
| Mean age of the first delivery<br>(day) ± S.E. | 72.8 ± 1.8 |
| N                                              | 58         |
| Minimum age of the first<br>delivery (day)     | 61         |

**c**

|                                               |              |
|-----------------------------------------------|--------------|
| Mean age of the last delivery<br>(day) ± S.E. | 204.2 ± 10.2 |
| N                                             | 54           |
| Maximum age of the last<br>delivery (day)     | 424          |

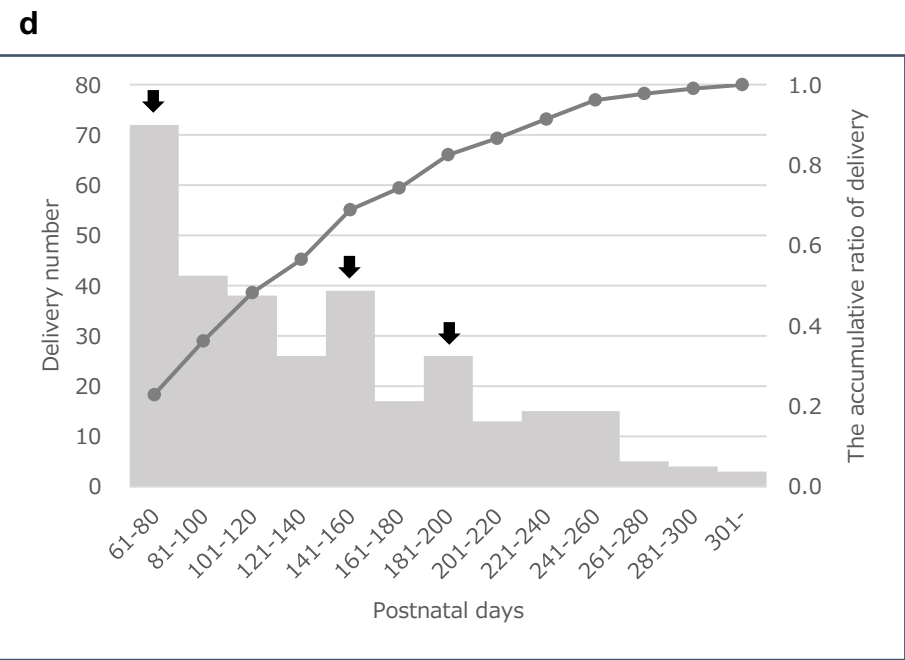

Supplemental Figure 1
