# Supplementary material
Source: publisher figshare collection journal article supplement (https://karger.figshare.com/articles/dataset/_/24131049)

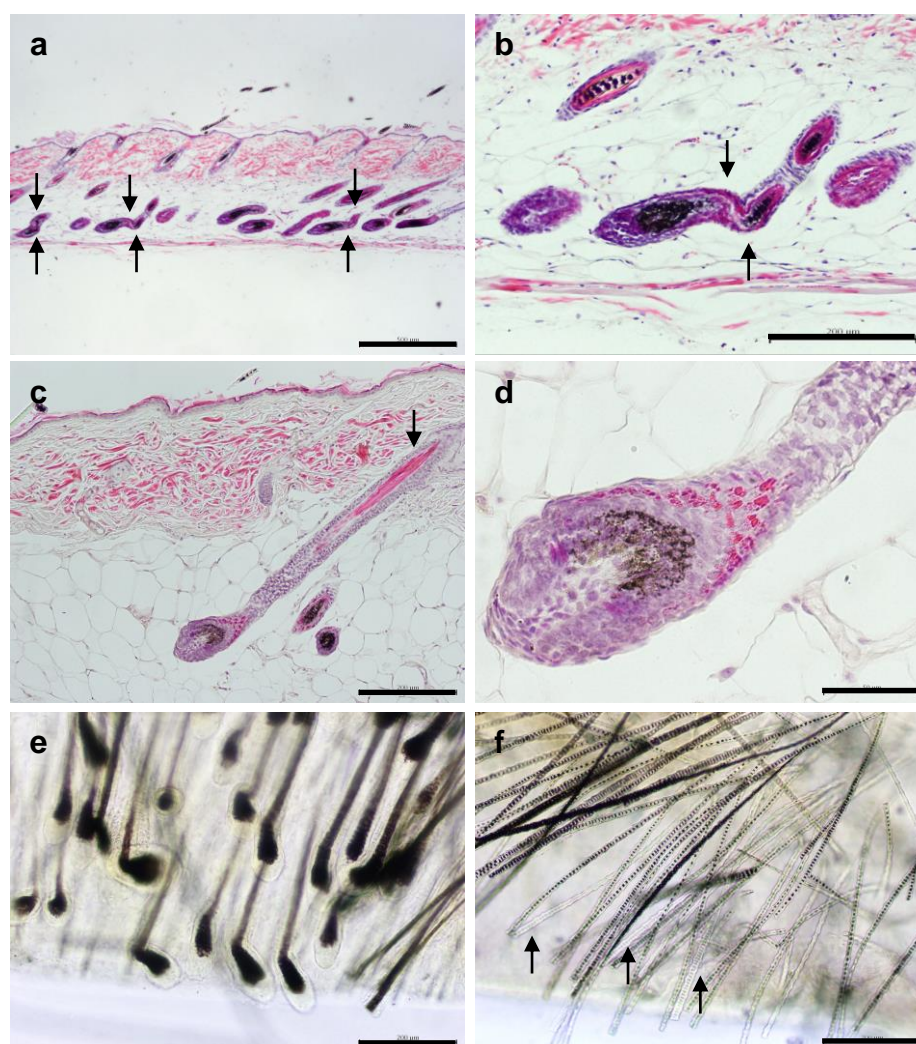

Supplemental Figure 3

Supplement: Supplementary file 2 [file 1]

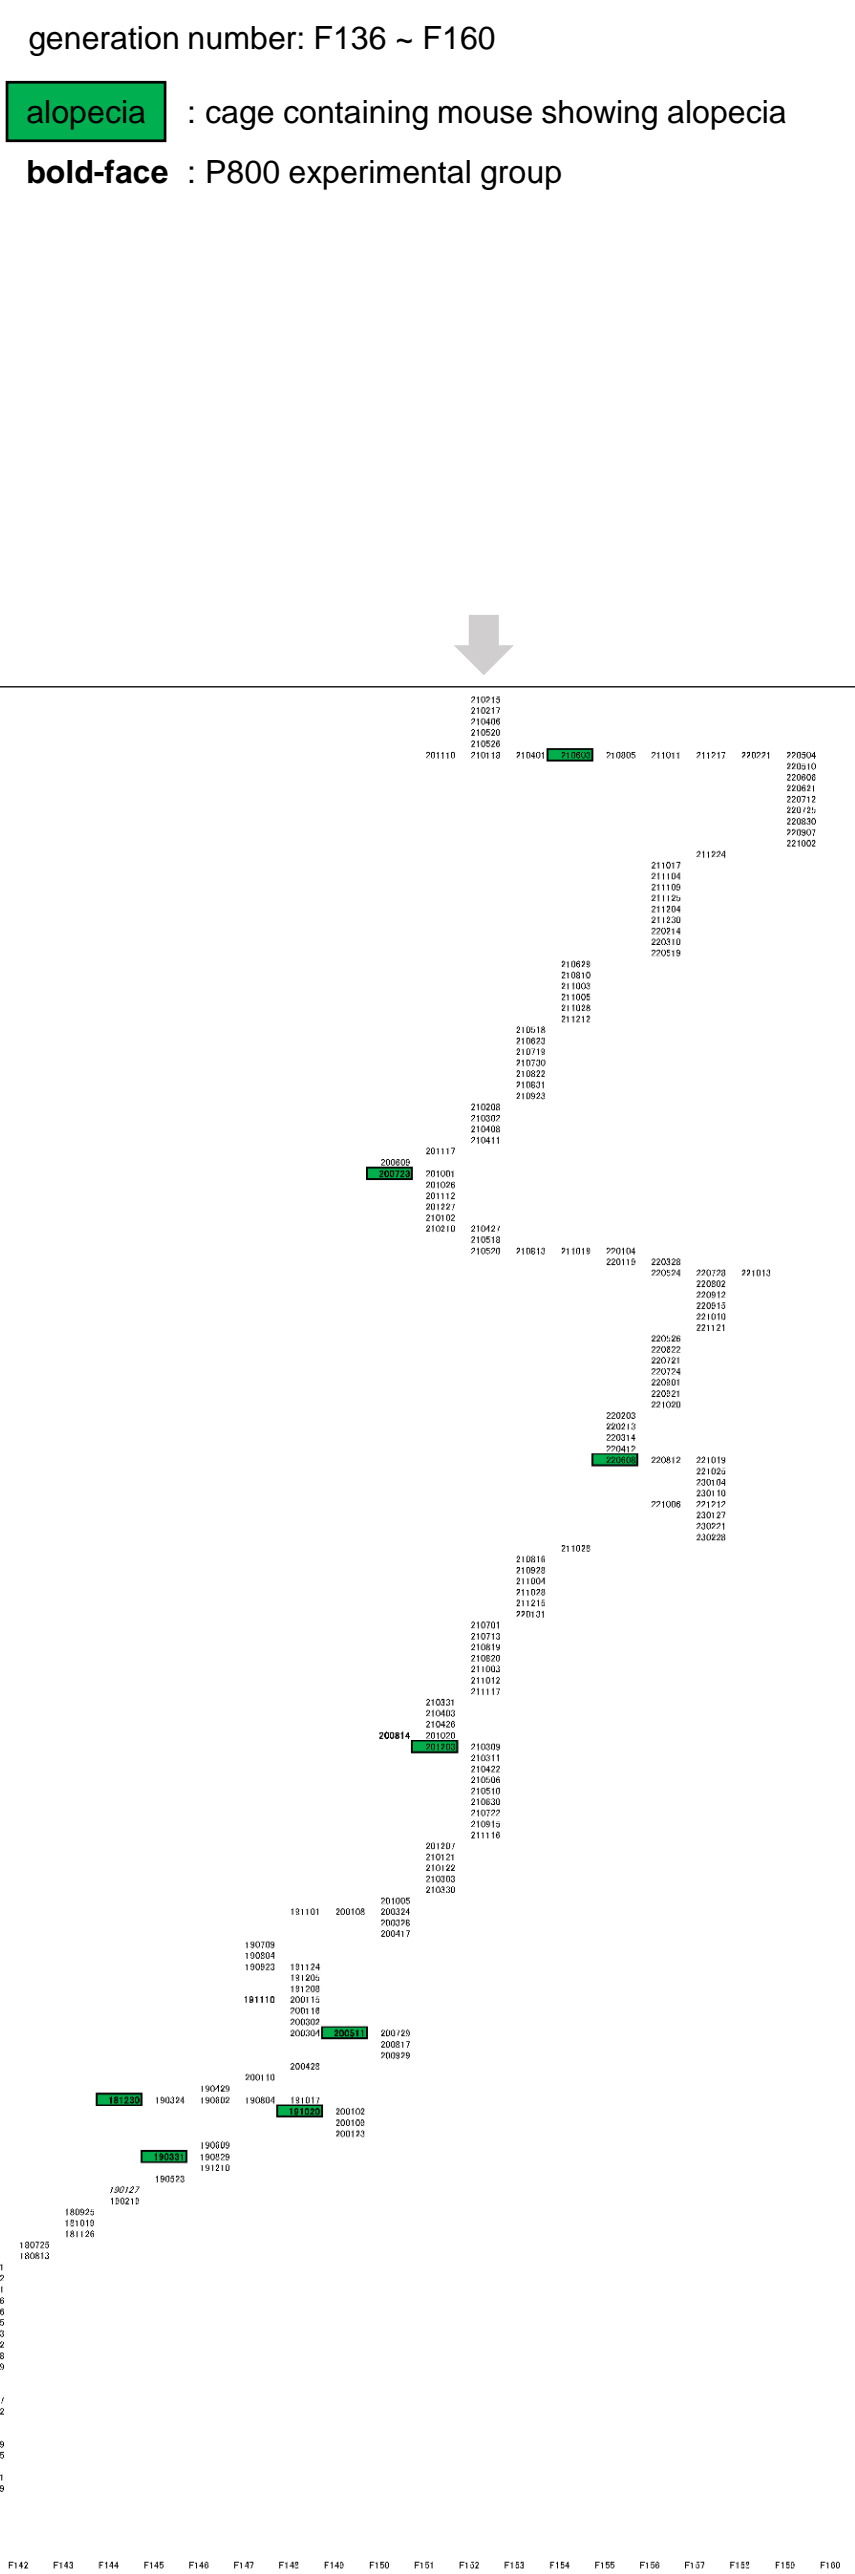

|      |      |      |      |      |      |      |      |      |      |      |      |      |      |      |      |      |      |      |      |      |      |      |      |      |
|------|------|------|------|------|------|------|------|------|------|------|------|------|------|------|------|------|------|------|------|------|------|------|------|------|
| F136 | F137 | F138 | F139 | F140 | F141 | F142 | F143 | F144 | F145 | F146 | F147 | F148 | F149 | F150 | F151 | F152 | F153 | F154 | F155 | F156 | F157 | F158 | F159 | F160 |
|------|------|------|------|------|------|------|------|------|------|------|------|------|------|------|------|------|------|------|------|------|------|------|------|------|

Supplement: Supplementary file 3 [file 1]

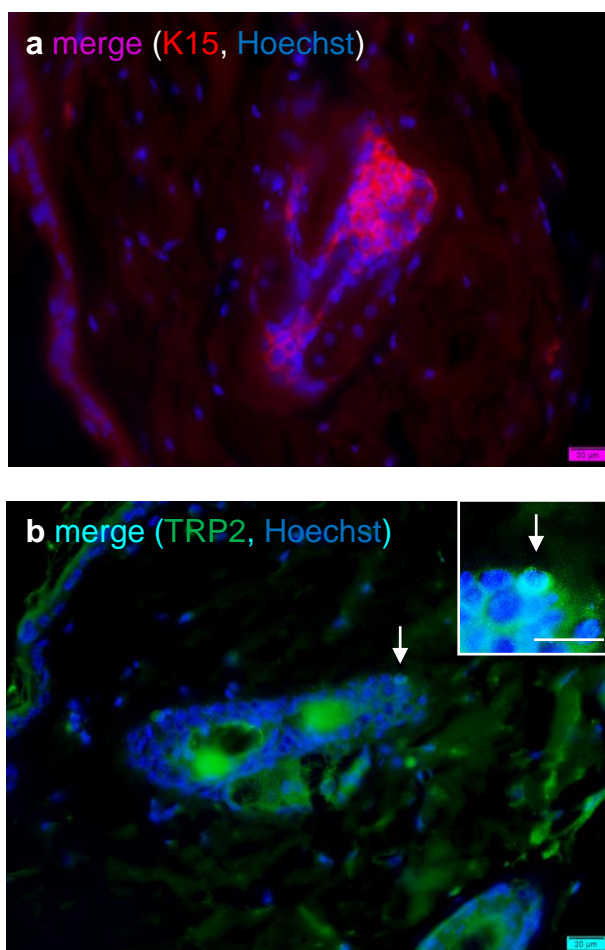

Supplement: Supplementary file 4 [file 1]
